# Supplementary material for: Superimposed topographic and chemical cues synergistically guide neurite outgrowth
Source: Royal Society of Chemistry journal article supplement (doi:10.1039/c3lc50174d), 2013-01-01
Supplement: c3lc50174d.pdf [file c3lc50174d.pdf]

## Figure s1

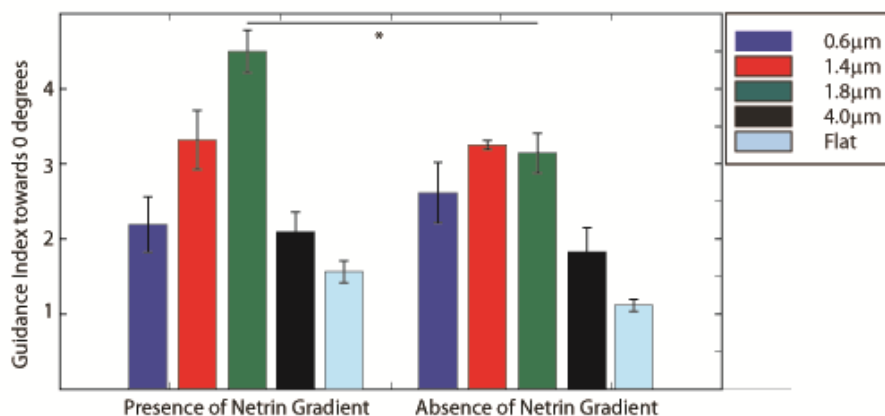

Fig s1 - The guidance indices towards 0° on the four different pillar arrays and flat substratum were compared in the presence and absence of a superimposing Netrin-1 gradient. (\* indicates  $p < 0.05$  using Tukey's HSD pair-wise comparison).  $n=3$  experimental replicates with 300-500 neurites for each pillar array in each replicate.
